# Supplementary material for: Genetic underpinnings of the transition from alcohol consumption to alcohol use disorder: shared and unique genetic architectures in a cross-ancestry sample
Source: bioRxiv or medRxiv preprint supplement (doi:10.1101/2021.09.08.21263302), 2021-09-13

# Supplemental Figure 1: Analytic methods

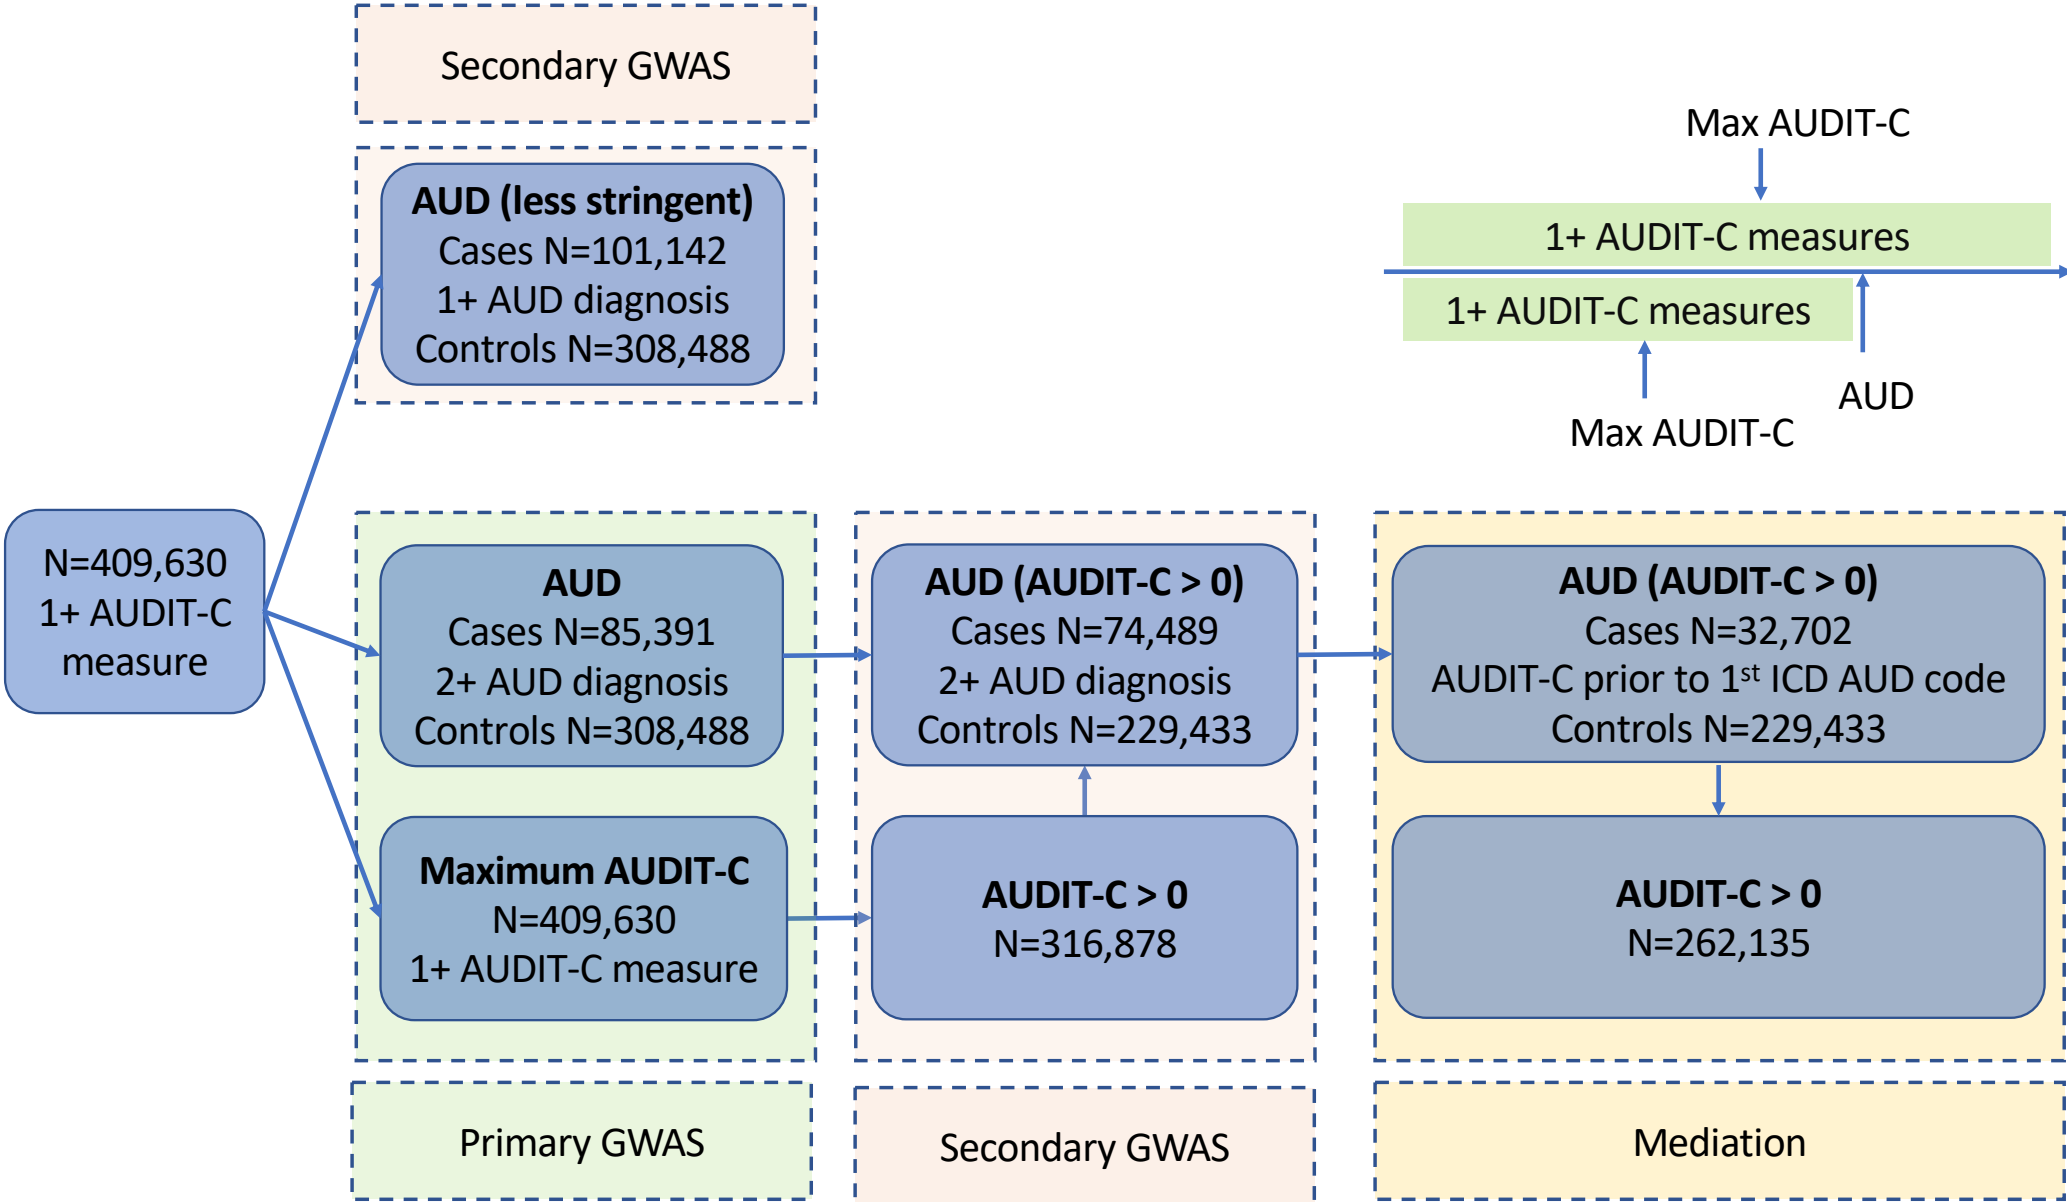

# Supplemental Figure 2: AUDIT-C scores

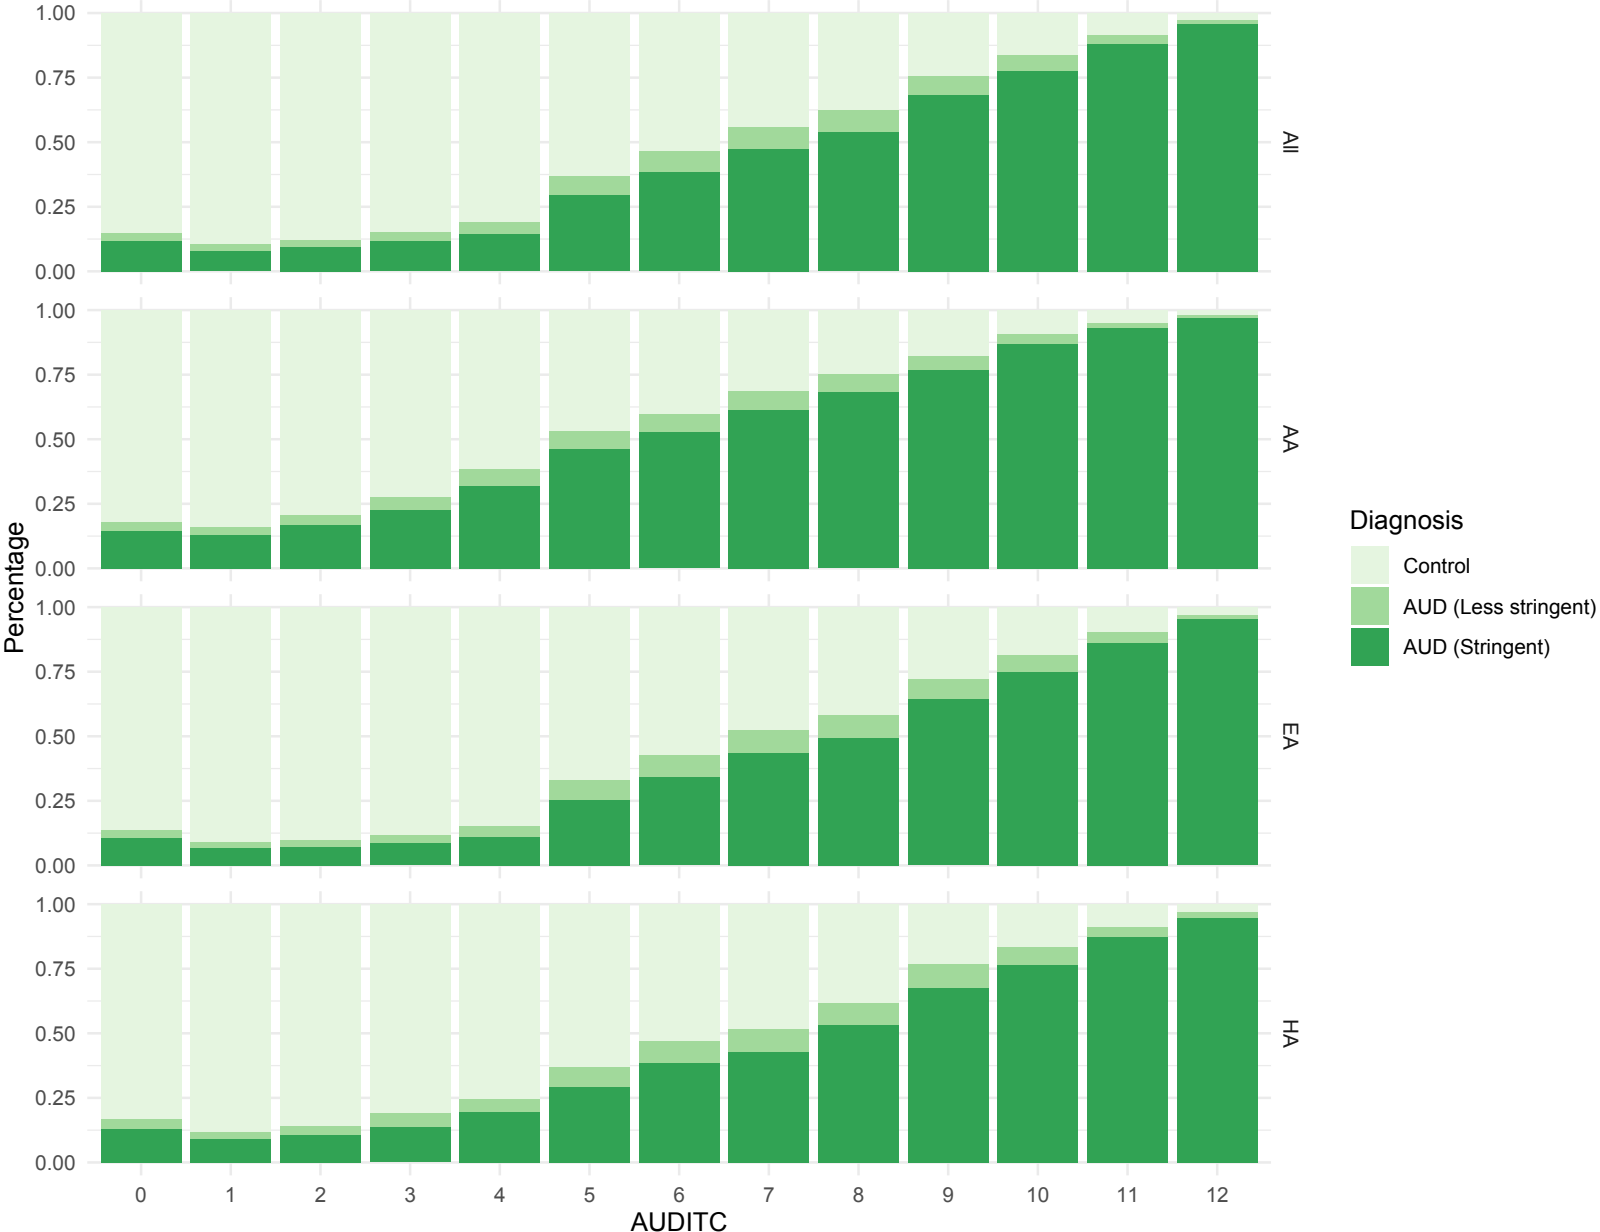

# Supplemental Figure 3: Summary of GWAS results

Numbers in circles at top represent number of GWS loci overlapping between GWAS

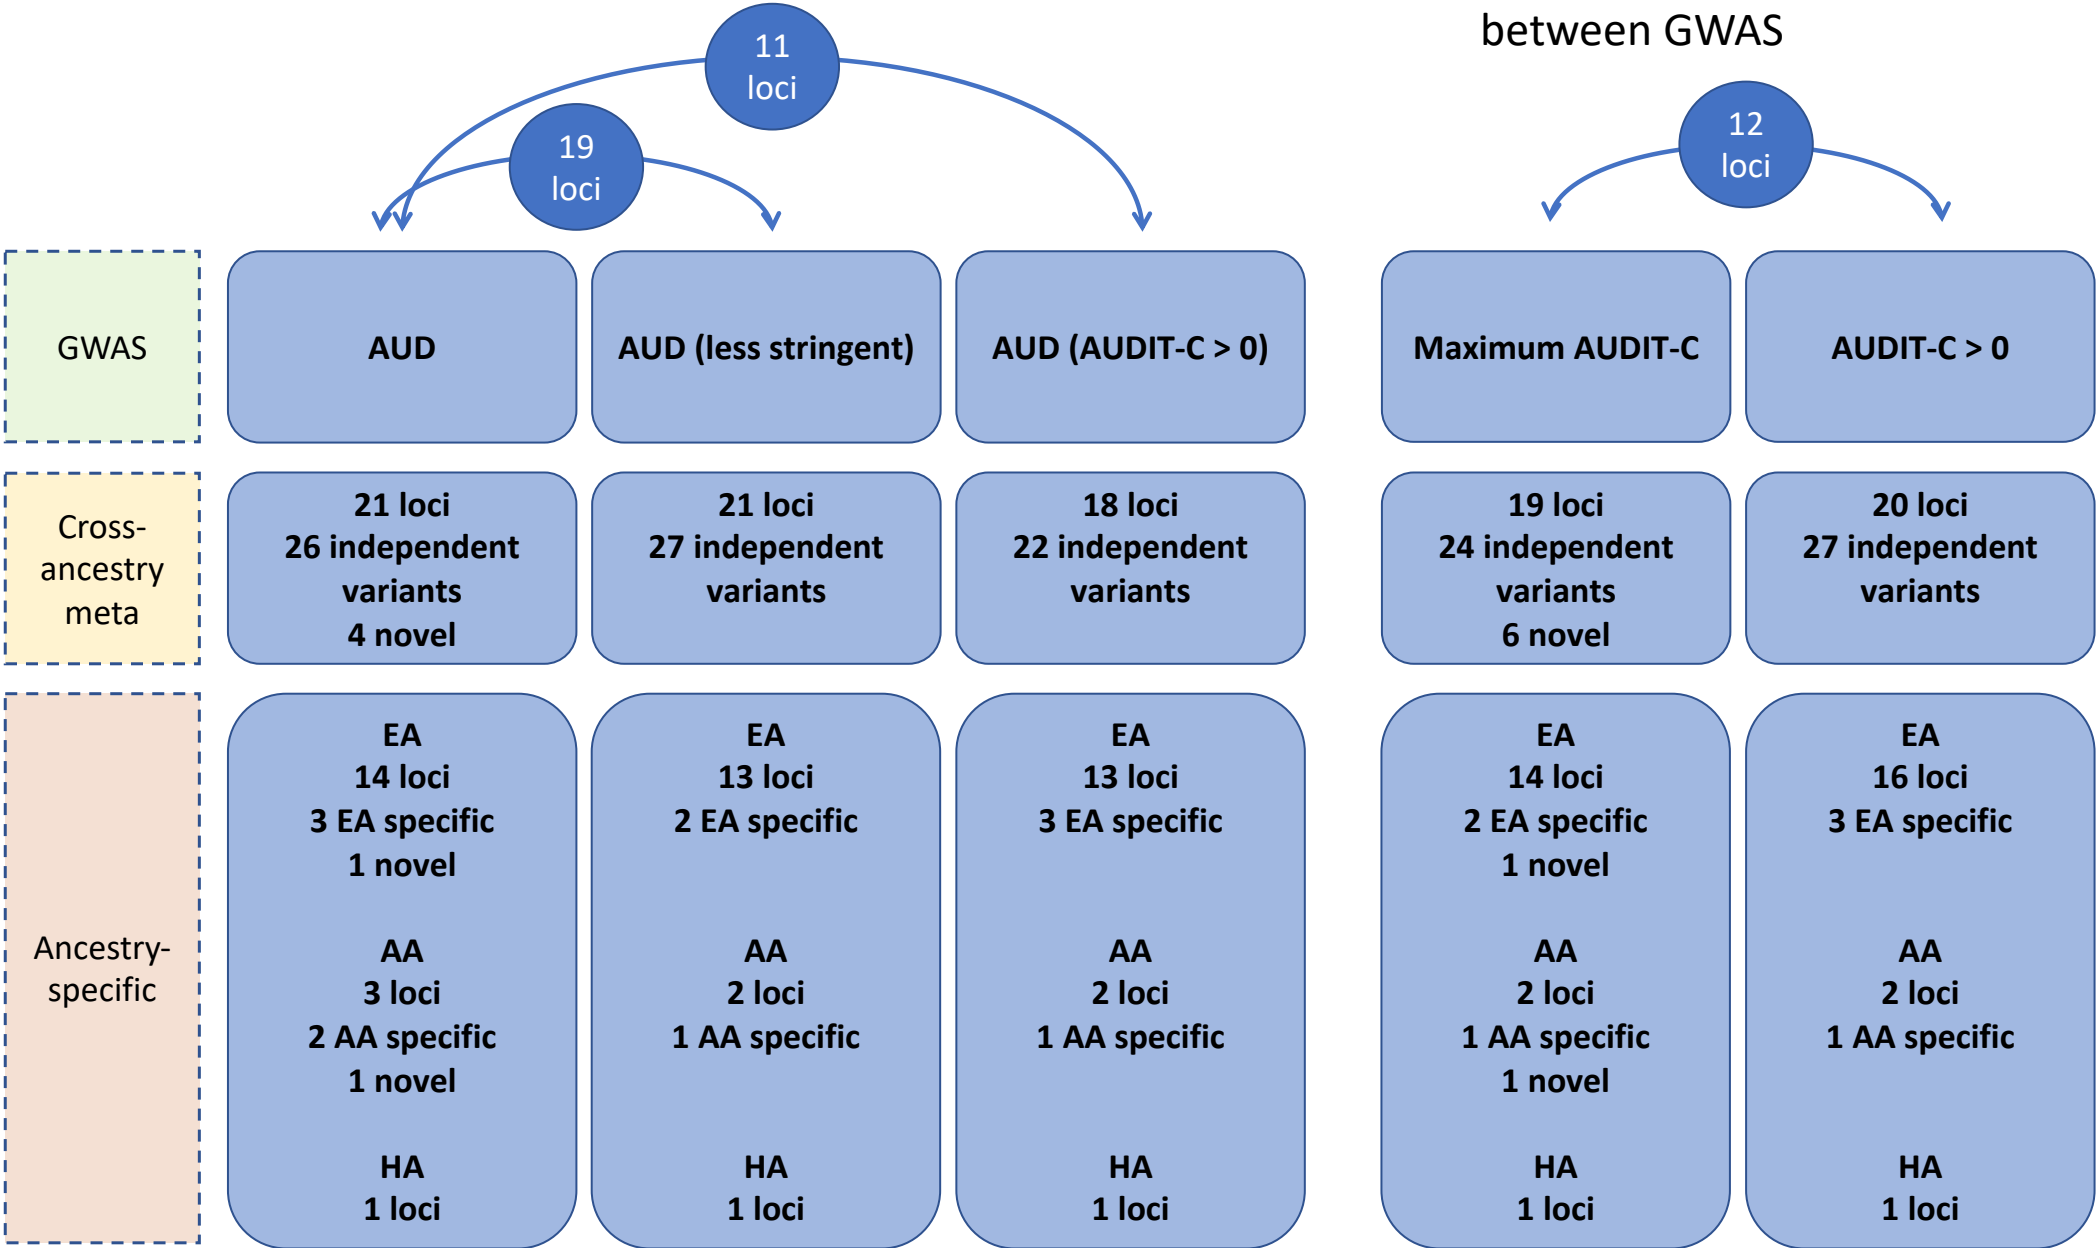

Supplemental Figure 4: Manhattan plots for AUD by ancestry

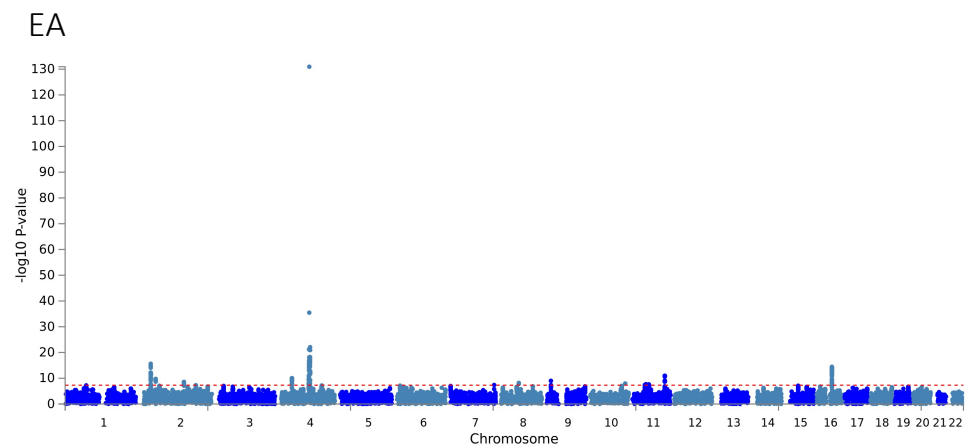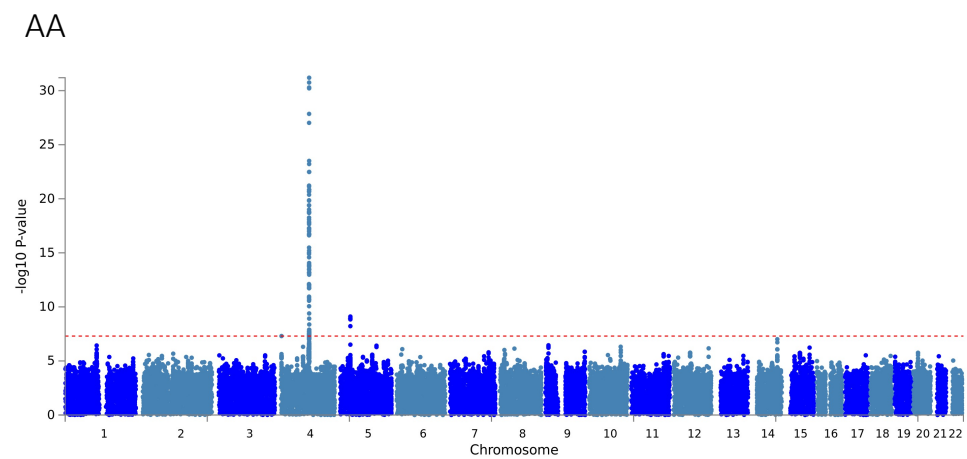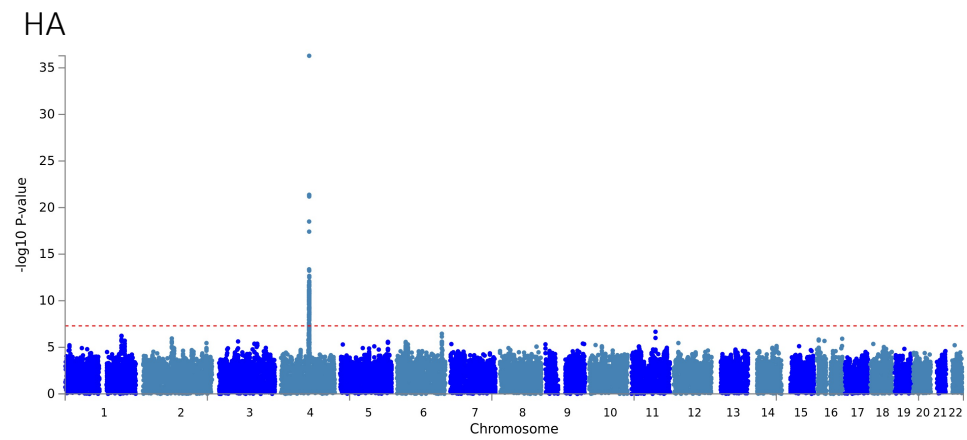

# Supplemental Figure 5: Locus zoom plots for ancestry-specific variants associated with AUD in EAs

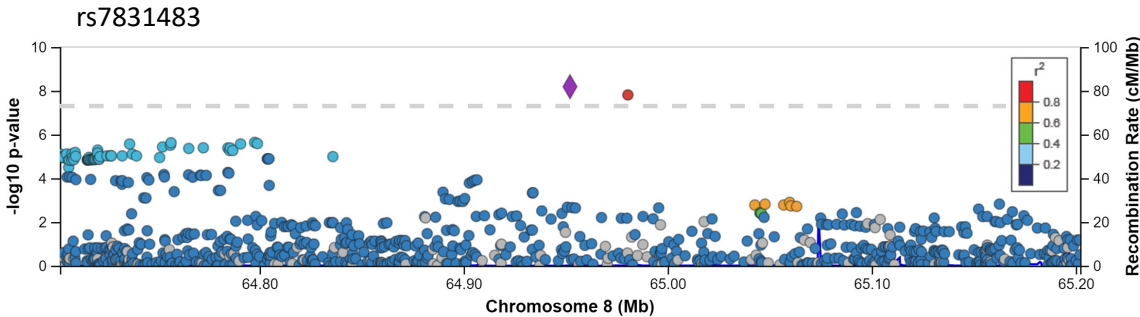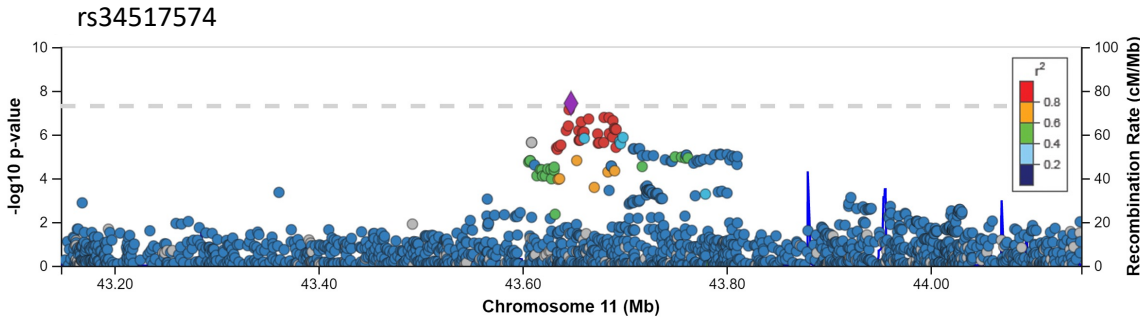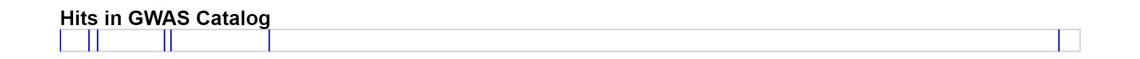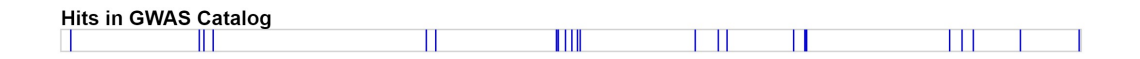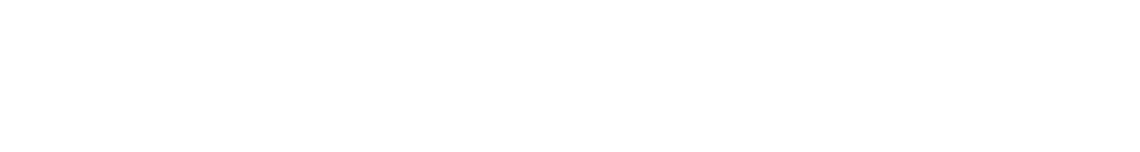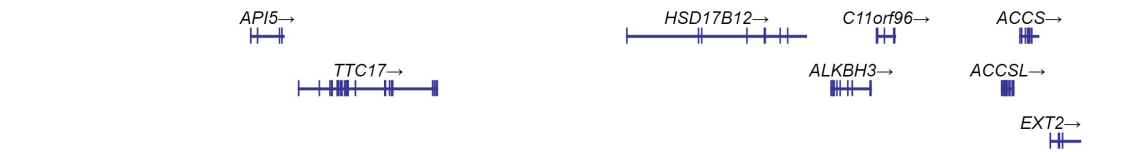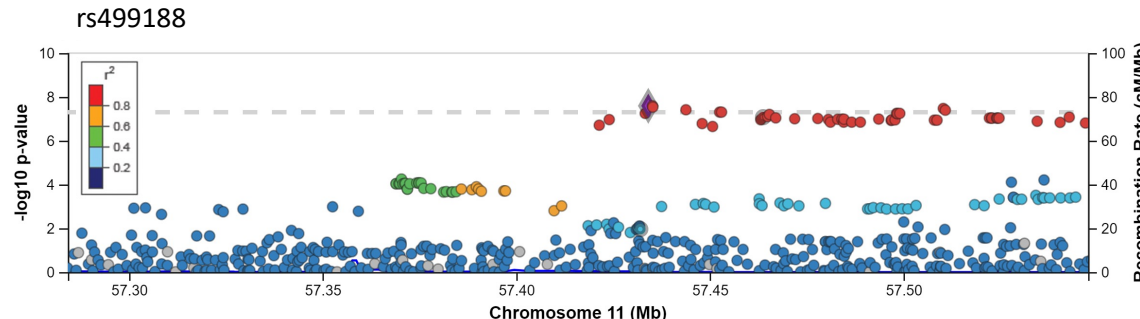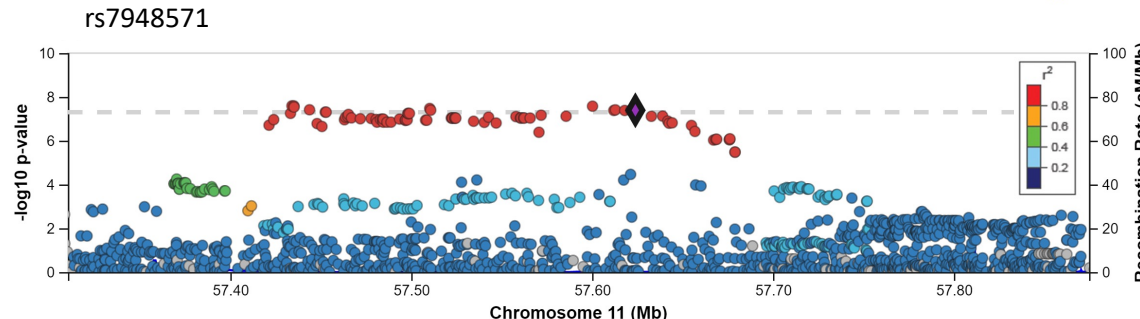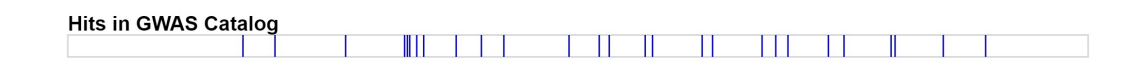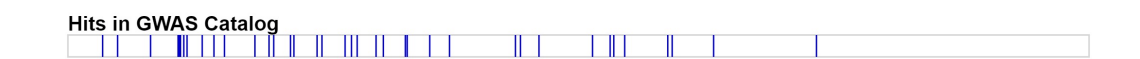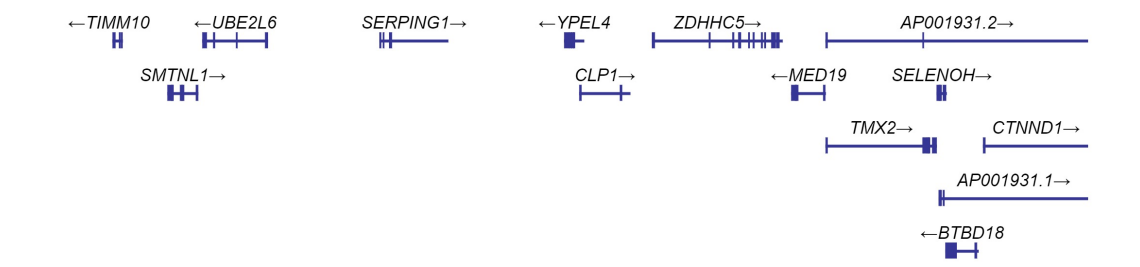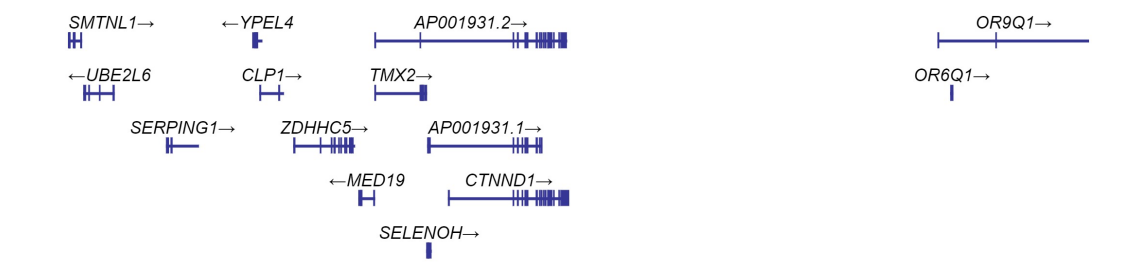

Supplemental Figure 6: Locus zoom plots for ancestry-specific variants associated with AUD in AAs

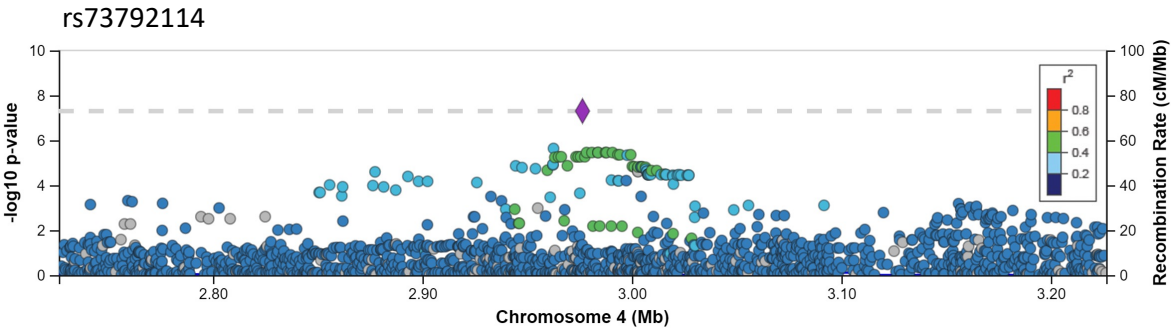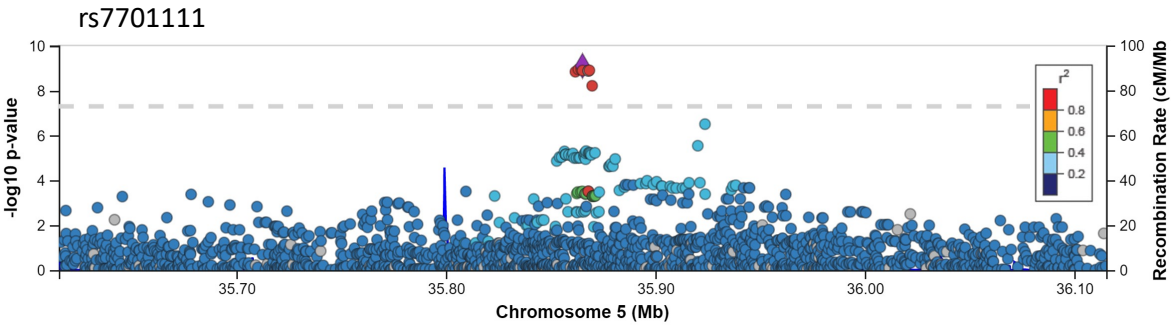

Hits in GWAS Catalog

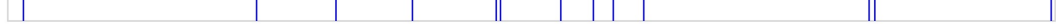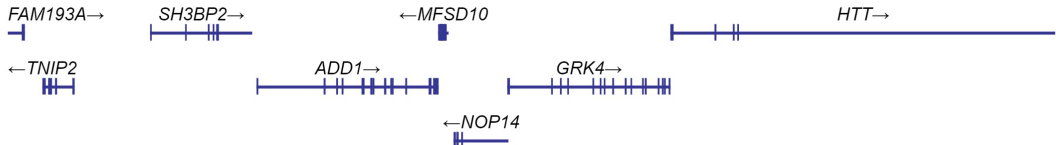

Hits in GWAS Catalog

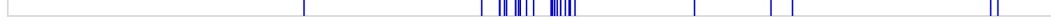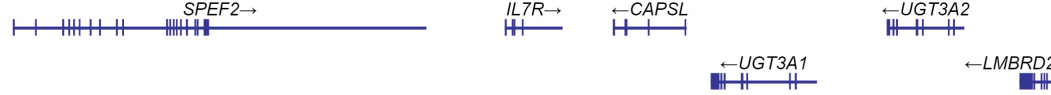

Supplemental Figure 7: Manhattan plots for AUDIT-C by ancestry

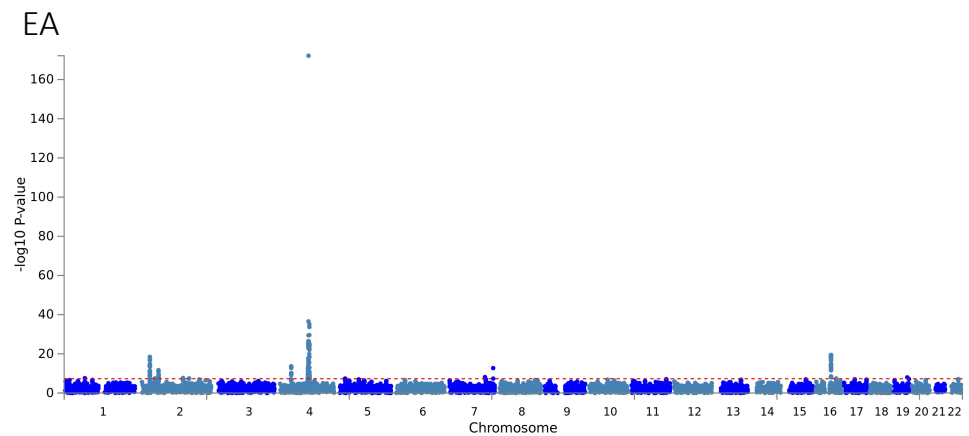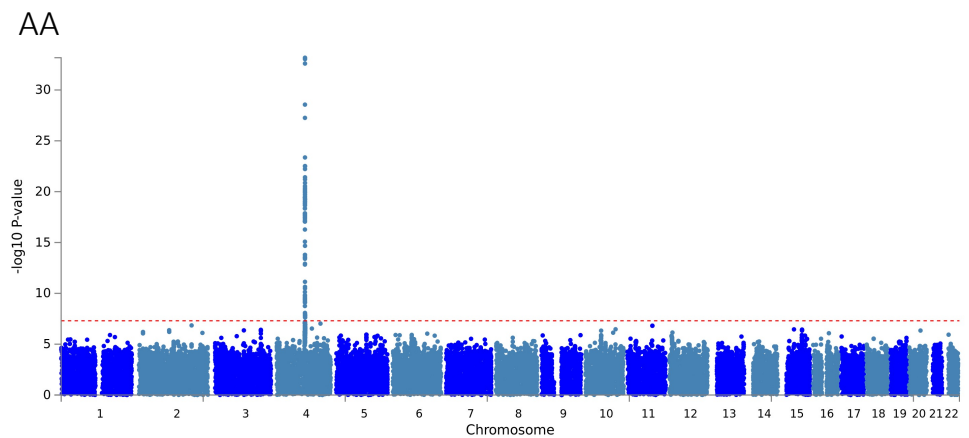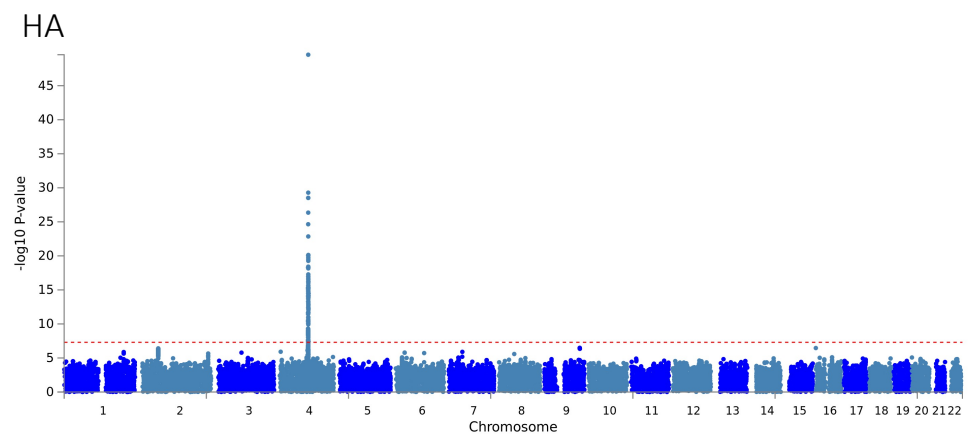

Supplemental Figure 8: Locus zoom plots for ancestry-specific variants associated with AUDIT-C in EAs

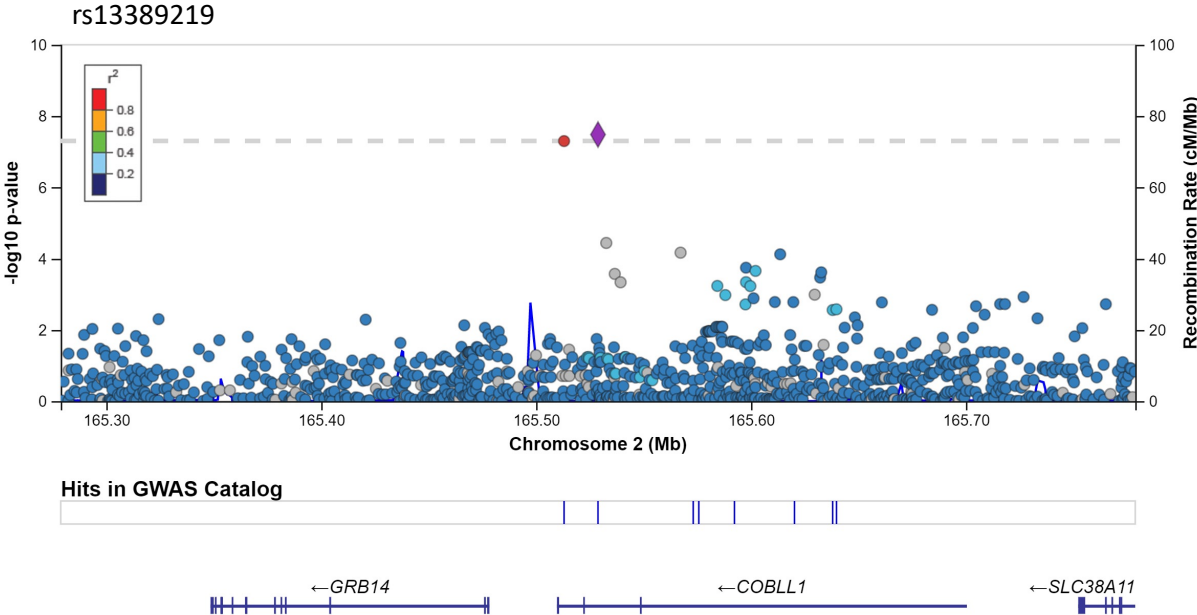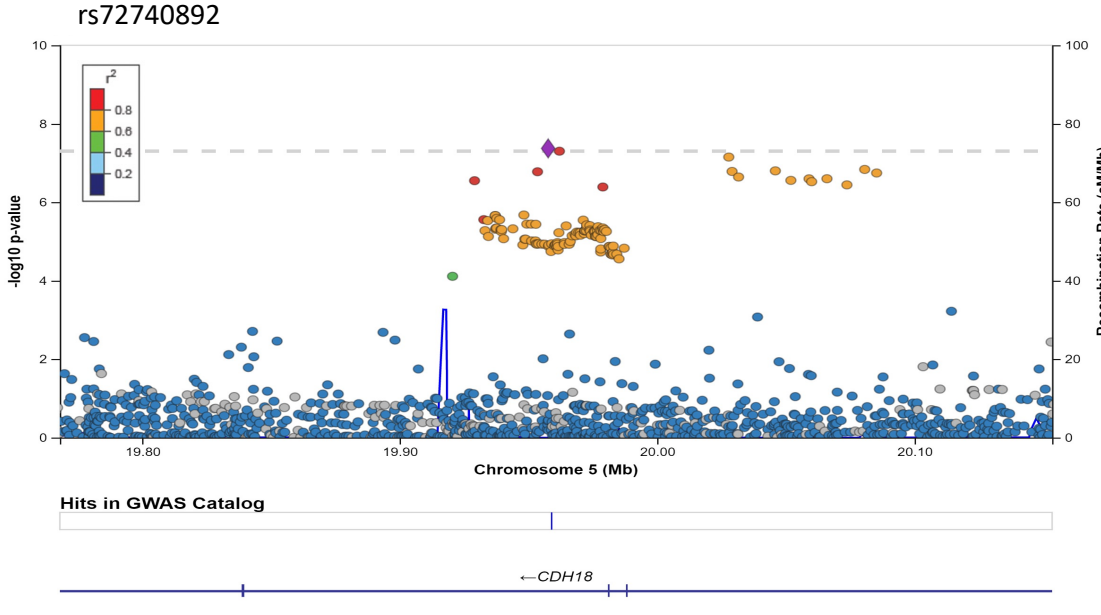



Supplemental Figure 9: Locus zoom plots for ancestry-specific variants associated with AUDIT-C in AAs

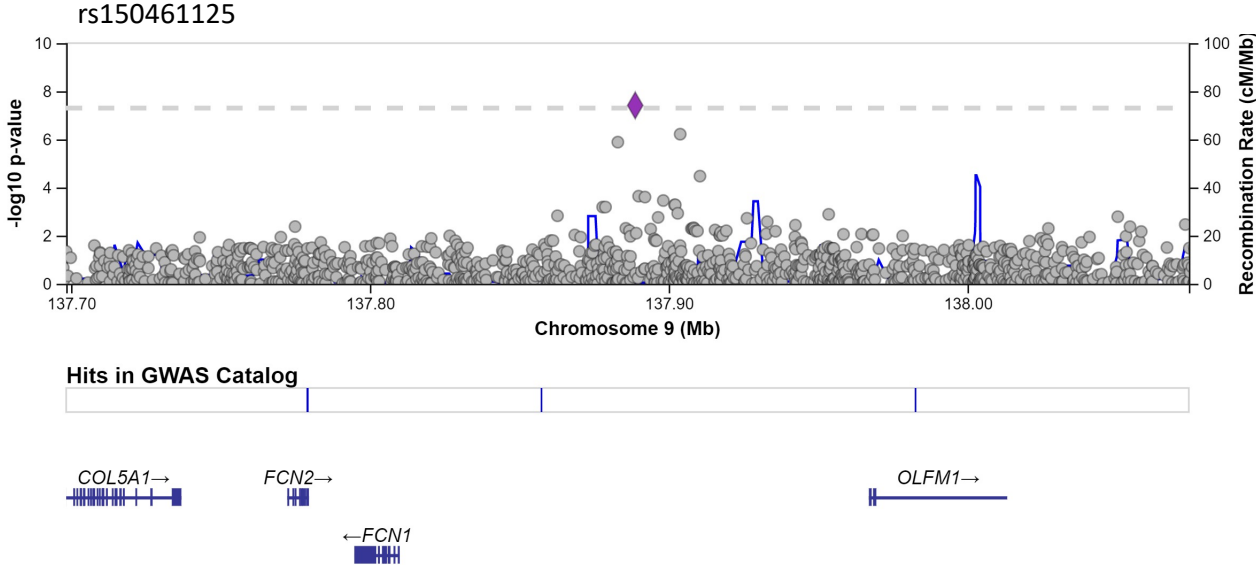

# Supplemental Figure 10: Manhattan plot for AUD (Less Stringent)

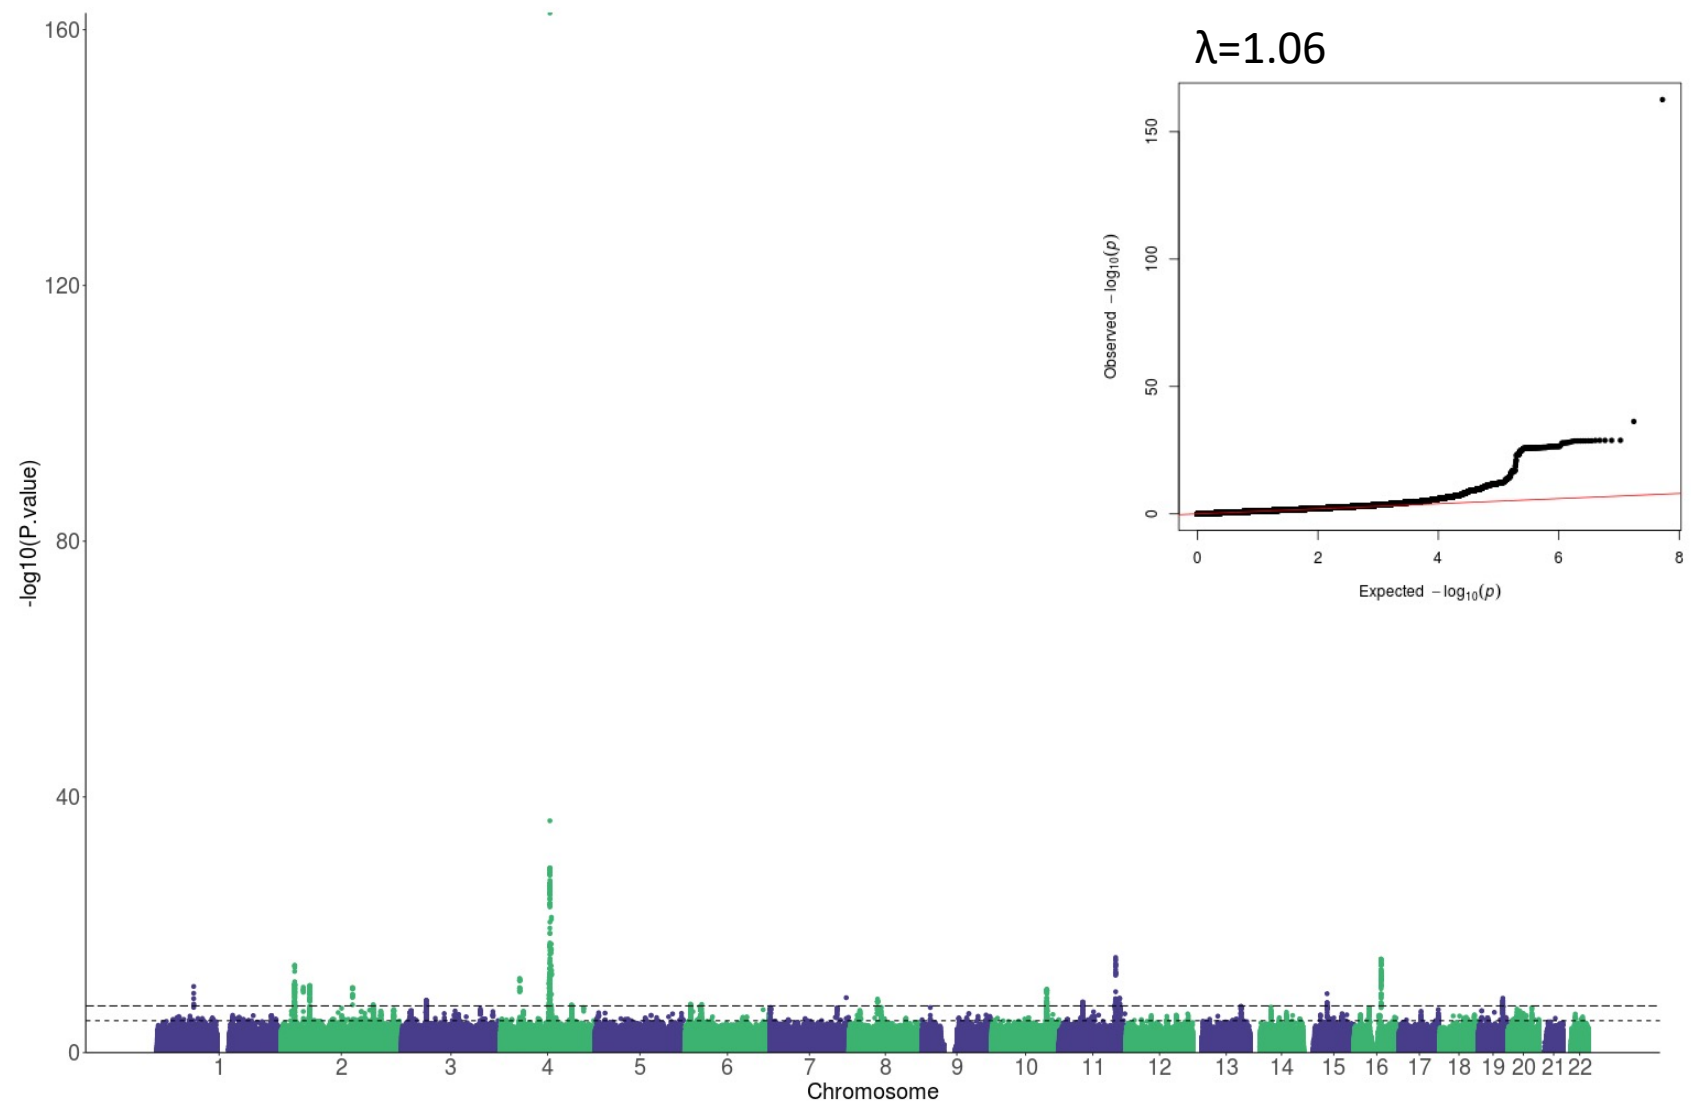

# Supplemental Figure 11: Manhattan plot for AUD (Stringent, AUDIT-C>0)

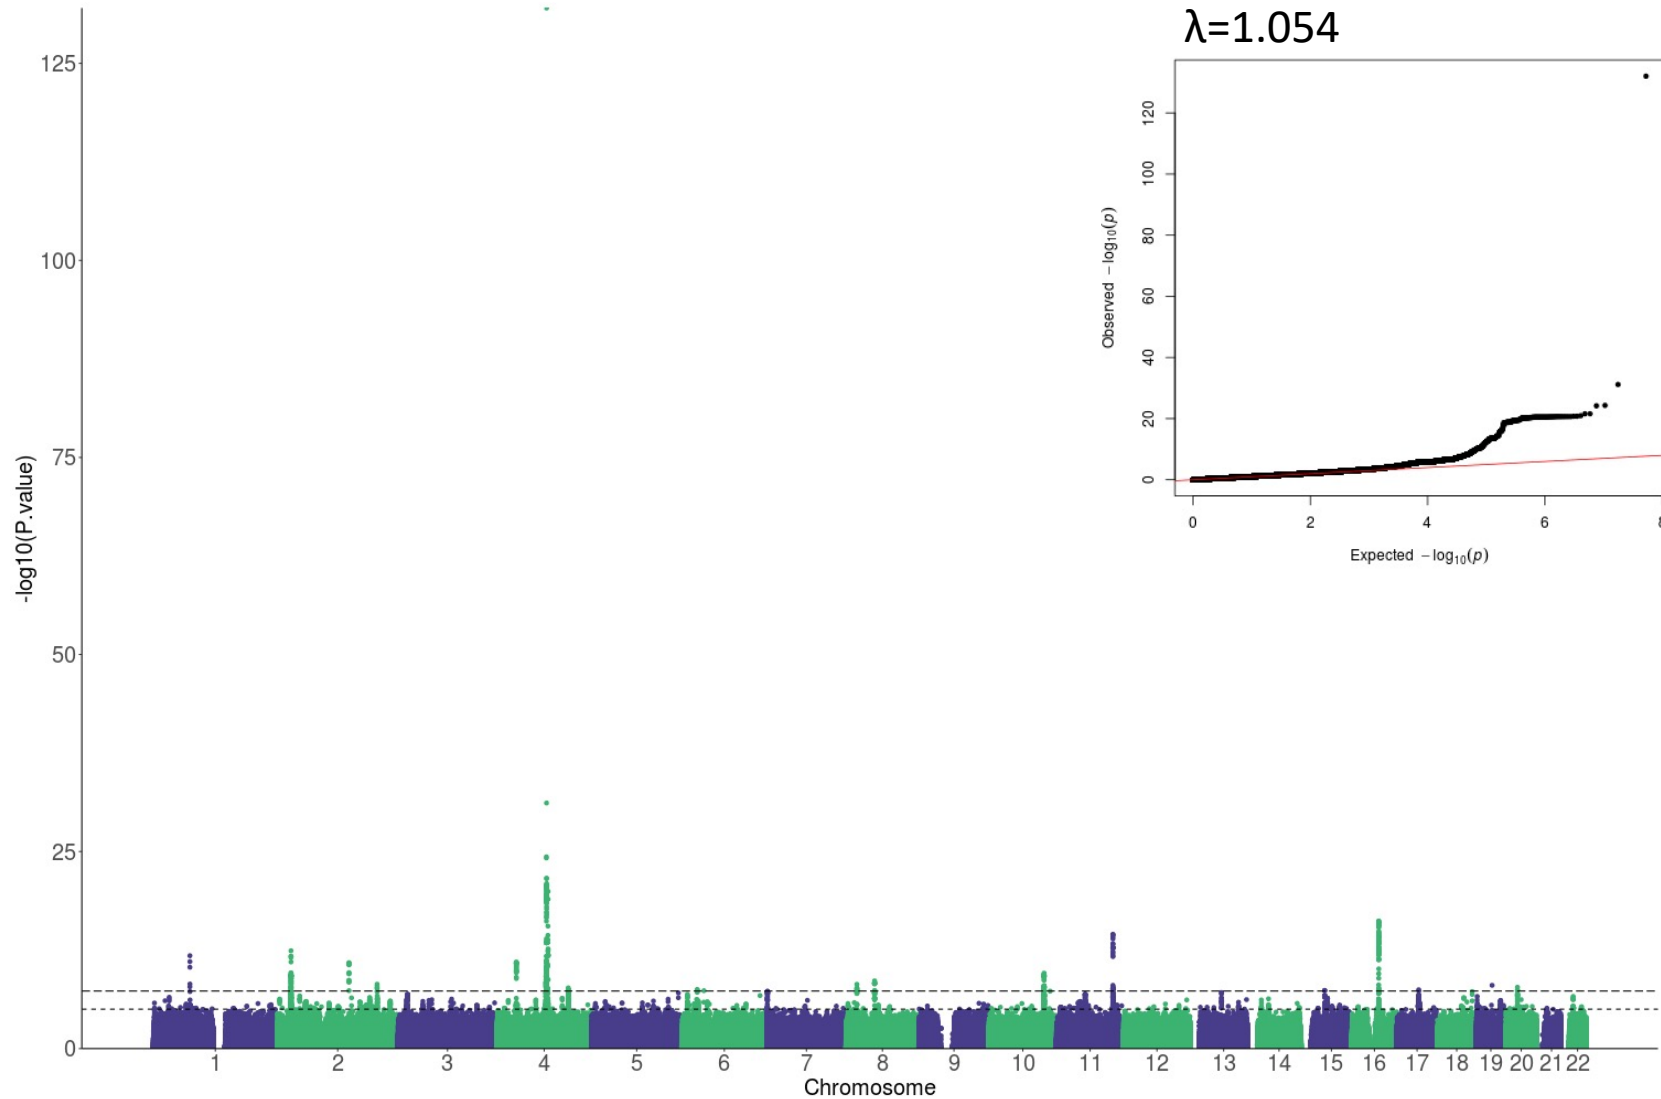

# Supplemental Figure 12: Manhattan plot for AUDIT-C>0

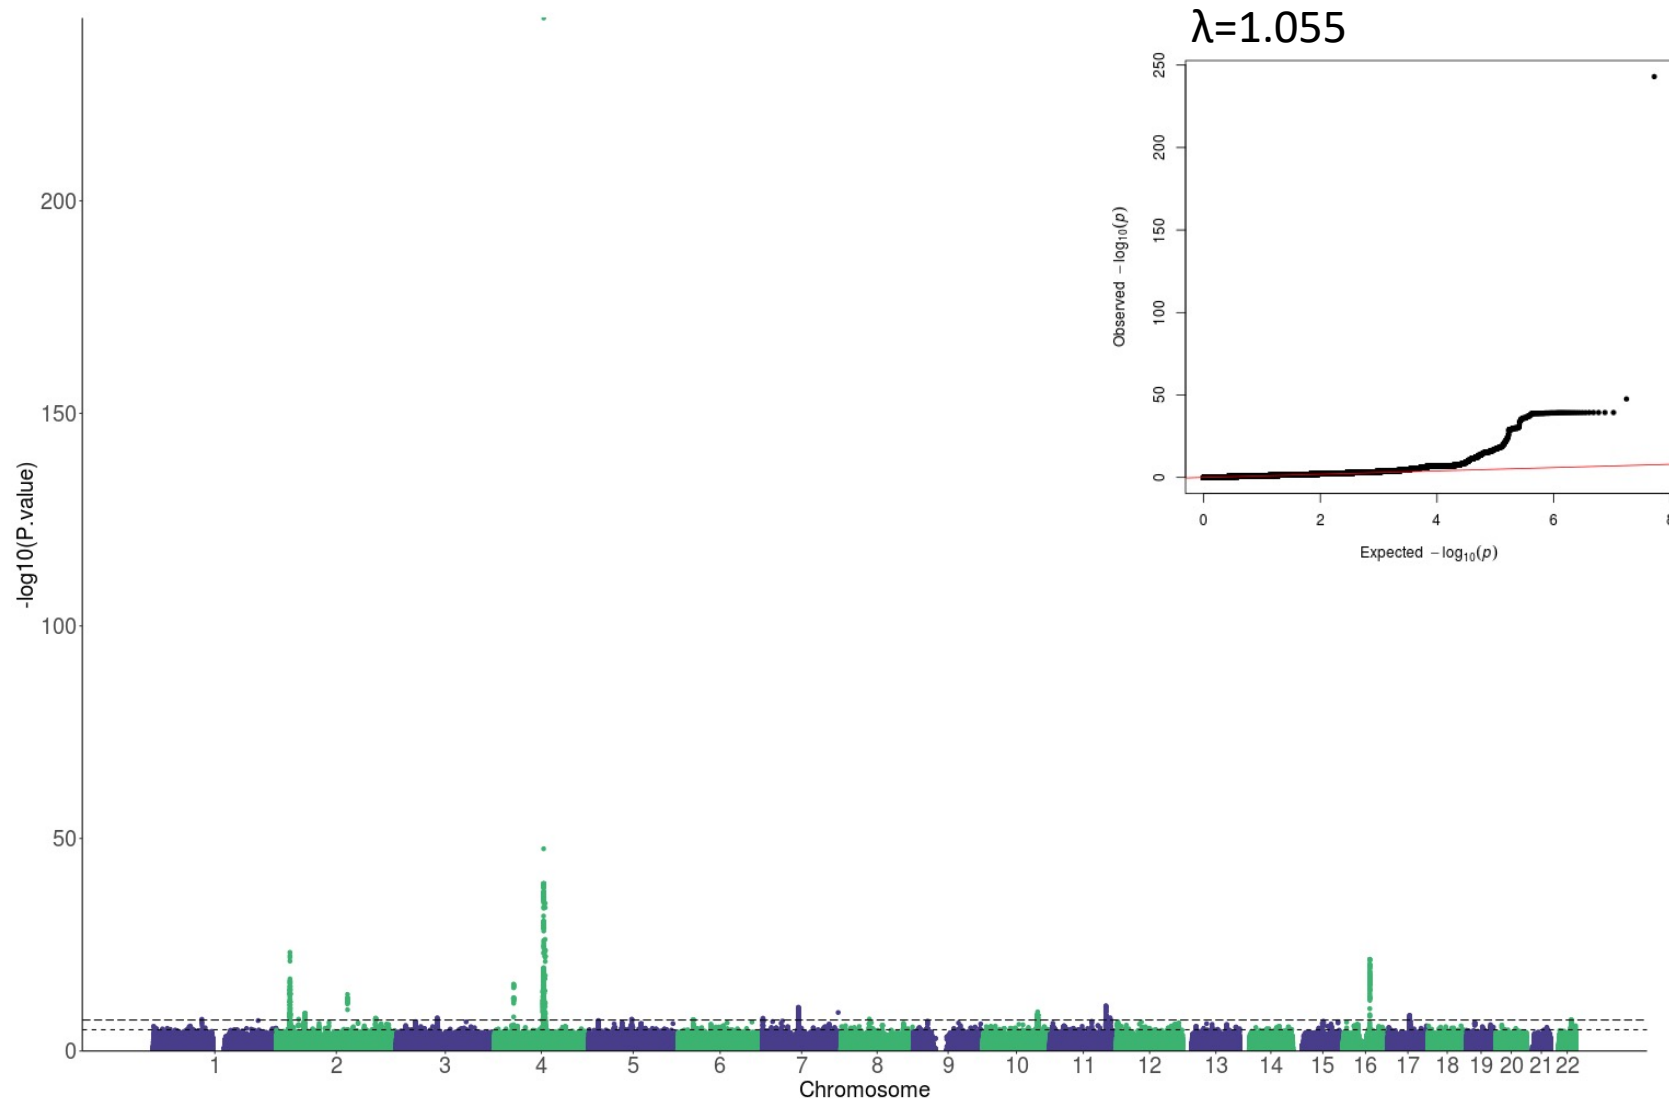

# Supplemental Figure 13: Gene-based association analyses for AUD

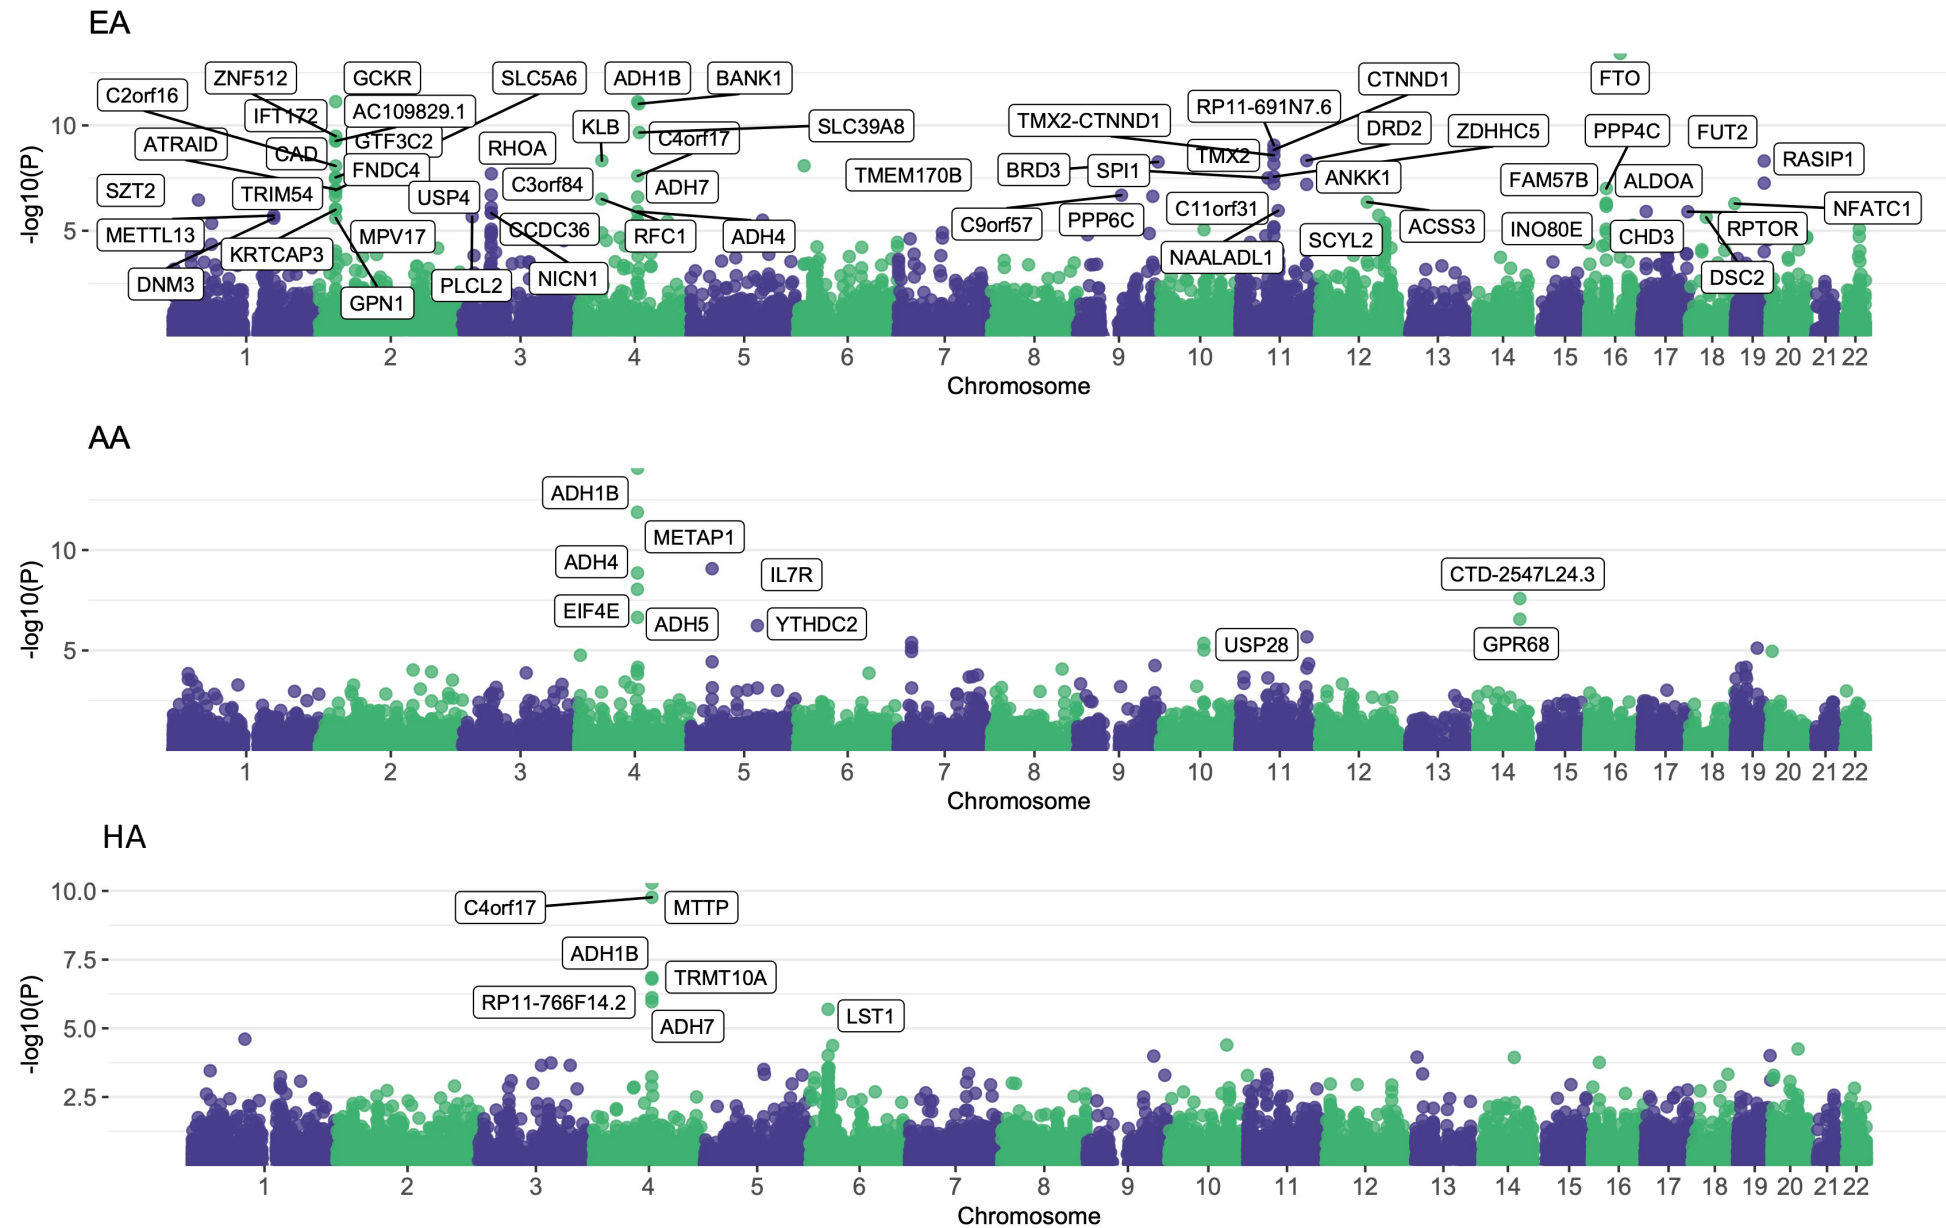

Supplemental Figure 14: Gene-based association analyses for AUDIT-C

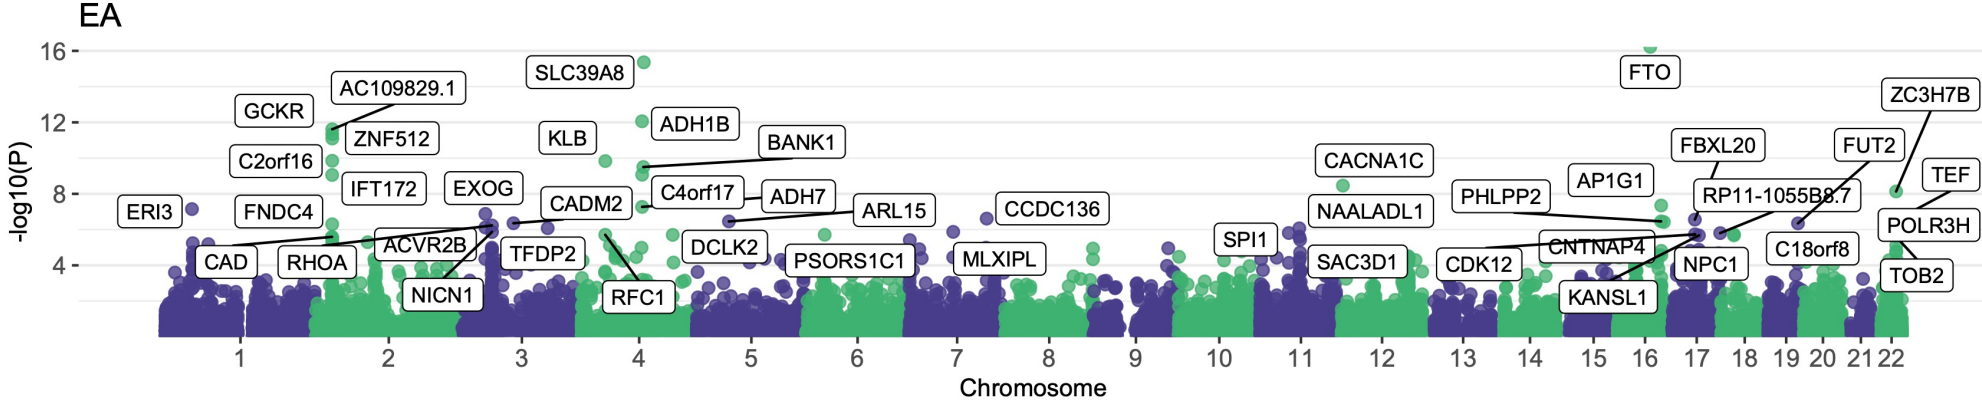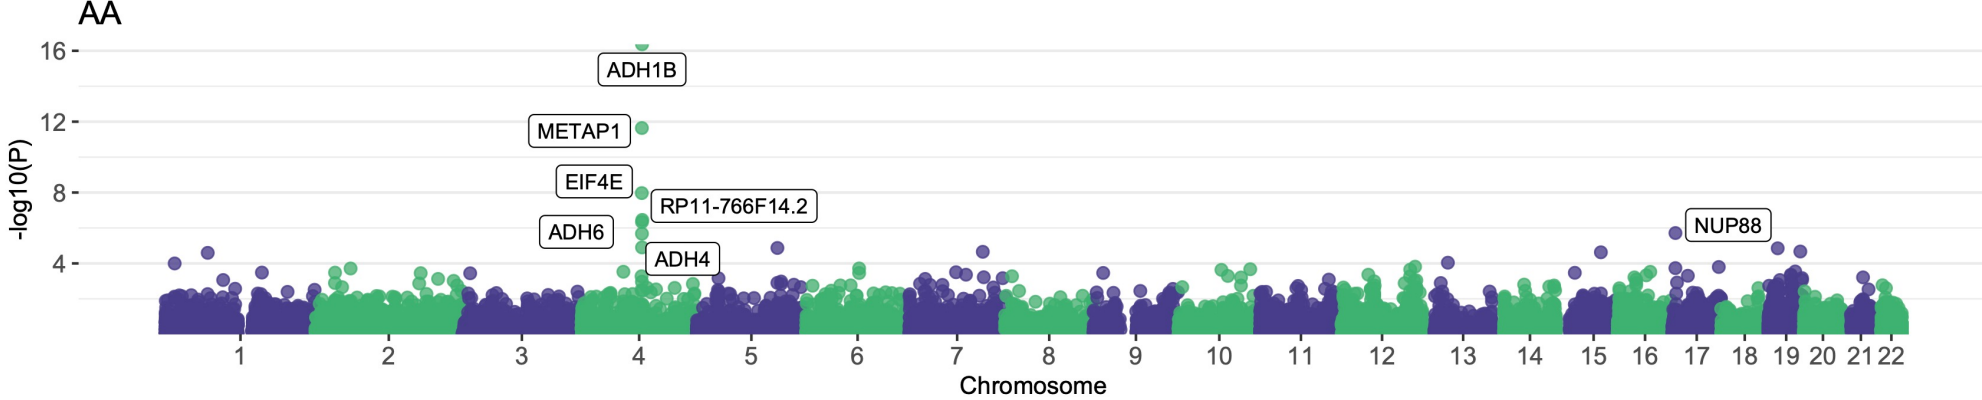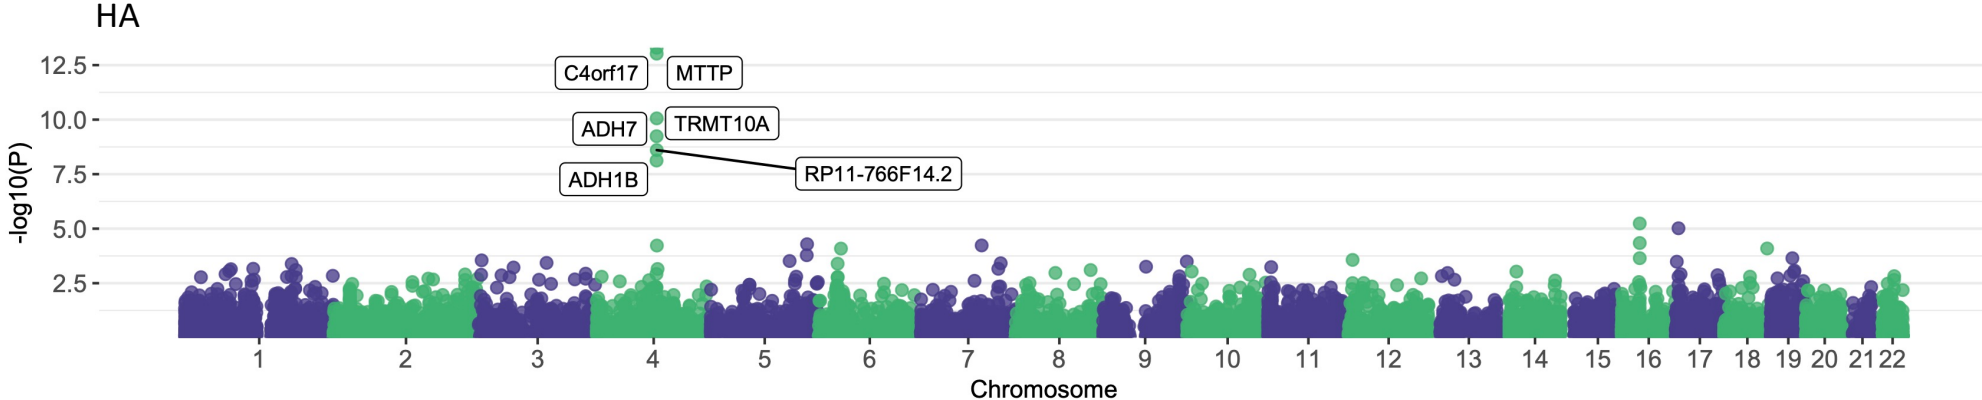

# Supplemental Figure 15: Genetic correlation between phenotypes

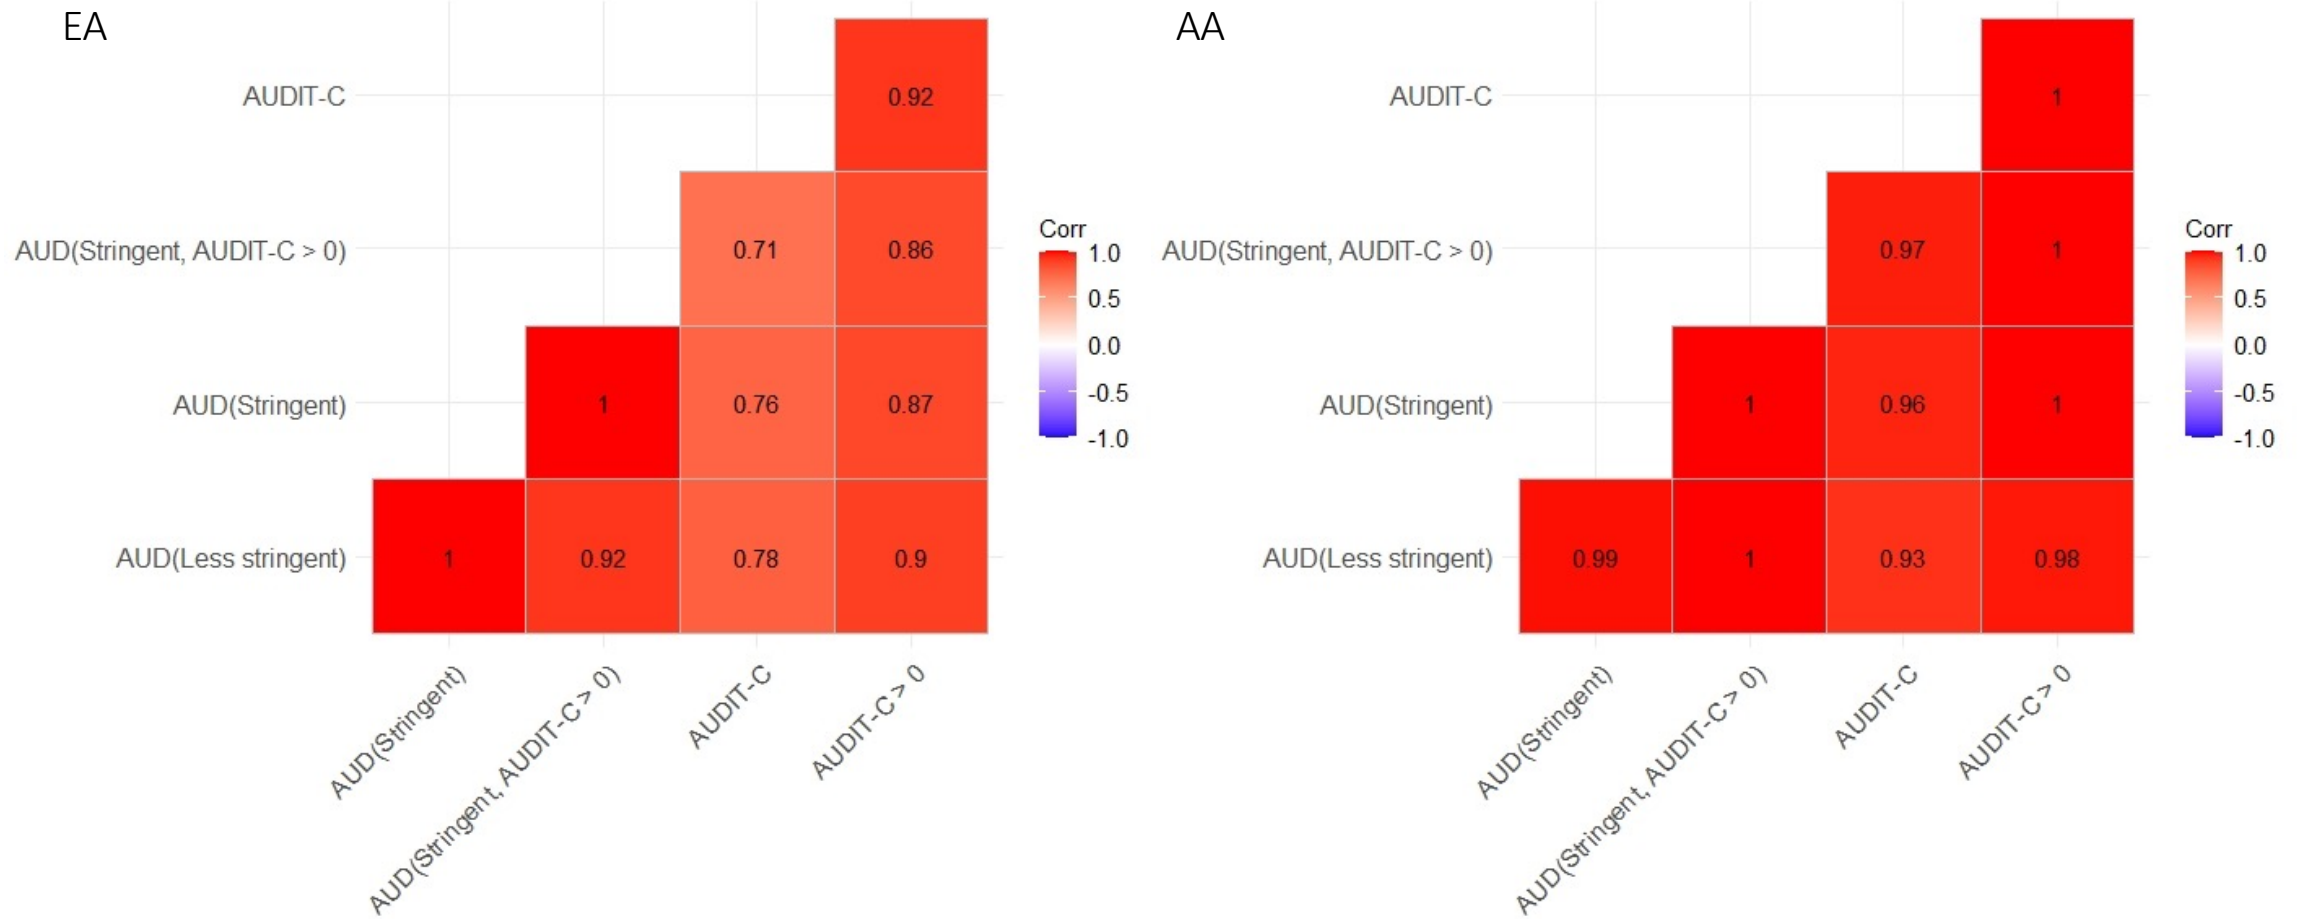

Supplement: Supplementary file [file media-2.pdf]
